# Supplementary material for: cGMP production of astatine-211-labeled anti-CD45 antibodies for use in allogeneic hematopoietic cell transplantation for treatment of advanced hematopoietic malignancies
Source: PubMed Central journal article supplement (PMC6193629; doi:10.1371/journal.pone.0205135), 2018-10-18
Supplement: pone.0205135.s014.pdf [file pone.0205135.s014.pdf]

## Table S1: Testing Conducted and Release Criteria for Each Component in <sup>211</sup>At-BC8-B10 Production

Table lists the type of test conducted, where it was conducted the release criteria that was used and examples of results obtained for one of the lots produced.

### Bulk Purified BC8 MAb (GMP-Used as intermediate)

| Test                 | Lab*   | Release Specification                                                       | Results Obtained            |
|----------------------|--------|-----------------------------------------------------------------------------|-----------------------------|
| Sterility            | FH-BPF | Negative                                                                    | Negative                    |
| Endotoxin            | FH-BPF | < 5 EU/mg MAb                                                               | <0.04 EU/mg (<0.5 EU/mL)    |
| Isotype              | FH-BPF | IgG <sub>1</sub>                                                            | IgG <sub>1</sub> identified |
| SDS-PAGE             | FH-BPF | Identification of intact MAb (non-reduced); Heavy/Light chains when reduced | Conforms to standard        |
| IEF                  | FH-BPF | Confirm expected isoforms (bands from pl 7.1-7.9)                           | Conforms to standard        |
| Protein A            | FH-BPF | < 3 ppm                                                                     | 0.32 ppm                    |
| SE-HPLC              | FH-BPF | Confirm monomeric status                                                    | Monomeric species, 100%     |
| UV; A280 Protein     | FH-BPF | > 0.1 mg/mL                                                                 | 1.28 mg/mL                  |
| Residual Bovine IgG  | FH-BPF | Report                                                                      | 0.08 ppm                    |
| Cell Binding By FACS | FH-TL  | > 70% to reference standard                                                 | 111% to ref. std.           |

### B10-NCS Conjugation Reagent (non-GMP-Used as Raw Material with Certificate of Analysis)

| Test          | Lab*    | Release Specification                                                                              | Results Obtained     |
|---------------|---------|----------------------------------------------------------------------------------------------------|----------------------|
| RP-HPLC       | UW-MRRL | Retention time conforms to reference standard (12.8 min)                                           | Conforms to standard |
| RP-HPLC, ELSD | UW-MRRL | ≥ 90% (area %) in peak                                                                             | 100% in peak         |
| Mass Spectra  | UW-MRRL | Mass conforms to theoretical mass (without counterions) 337.23 Da (100%) – has B10 isotope pattern | 337.23 Da (100%)     |

### Purified Bulk BC8-B10 MAb Conjugate (cGMP-Used as intermediate)

| Test      | Lab*   | Release Specification                                      | Results Obtained |
|-----------|--------|------------------------------------------------------------|------------------|
| Sterility | FH-BPF | Negative                                                   | Negative         |
| Endotoxin | FH-BPF | < 10 EU/mg BC8-B10                                         | 0.1 EU/mg        |
| SDS-PAGE  | FH-BPF | >90% ~150 kDa band non-reduced;<br>>90% H&L chains reduced | Passed           |
| IEF       | FH-BPF | Confirm expected isoforms                                  | Passed           |
| SE-HPLC   | FH-BPF | Confirm monomeric status (>90%)                            | Monomeric, 96.4% |

### Vial BC8-B10 MAb Conjugate (cGMP-Used as intermediate)

| Test             | Lab*   | Release Specification                                                     | Results Obtained                 |
|------------------|--------|---------------------------------------------------------------------------|----------------------------------|
| MALDI-TOF MS     | FH-BPF | Report mass spectra data                                                  | Found avg. 2.7 molar equivalents |
| Immunoreactivity | FH-TL  | ≥ 70% similar to labeled control                                          | Ramos: 87%, Raji: 93%            |
| General Safety   | FH-TL  | CFR 21. 610.11                                                            | Met requirements                 |
| Sterility        | FH-BPF | Tests at 3, 7 & 14 days negative                                          | Negative                         |
| Endotoxin        | FH-BPF | ≤ 10 EU/mg BC8-B10                                                        | < 1 EU/mg                        |
| SDS-PAGE         | FH-BPF | > 90% ~150 kDa band, non-reducing<br>> 90% heavy & light chains, reducing | Passed                           |
| UV; A280 Protein | FH-BPF | 4.5-5.5 mg/mL (predefined)                                                | 5.1 mg/mL                        |

### <sup>211</sup>At]NaAt (non-GMP-Used as Raw Material with Certificate of Analysis)

| Test                        | Lab*   | Release Specification                                           | Results Obtained |
|-----------------------------|--------|-----------------------------------------------------------------|------------------|
| Radio-TLC (Identity)        | UW-RPL | Conforms to <sup>125</sup> I-Labeled Reference Standard         | Passed           |
| Radio-TLC (Chromat. Purity) | UW-RPL | ≥ 85% (area %) Na <sup>211</sup> At]At                          | 95.9%            |
| HPLC (Radionuclidic Purity) | UW-RPL | >99+% <sup>211</sup> At (no <sup>210</sup> At) - test quarterly | Passed           |

### <sup>211</sup>At-BC8-B10 (cGMP-Final Product for Administration-Batch Record)

| Test                             | Lab*    | Release Specification                                                                    | Results Obtained               |
|----------------------------------|---------|------------------------------------------------------------------------------------------|--------------------------------|
| Quantity of Radiolabeled Product | UW-NMRL | Set by weight of patient and dose prescribed (μCi/kg) ± 20 at midpoint of injection      | Dose +10% delivered midpoint   |
| Sterility                        | UW-NMRL | Tests at 3, 7 & 14 days negative<br>Conducted, but not used for release due to half-life | Negative - post administration |
| Pyrogenicity                     | UW-NMRL | < 5.0 EU/kg/hr                                                                           | Passed                         |
| iTLC purity                      | UW-NMRL | ≥ 90%                                                                                    | 97.2%                          |
| FACS cell binding                | UW-NMRL | >50% at time of assay;<br>Conducted, but not used for release due to half-life           | Passed                         |

\*Laboratories are: FH-BPF, Fred Hutch Biological Production Facility; FH-TL, Fred Hutch Testing Laboratory; UW-MRRL, University of Washington Molecular Radiotherapy Research Laboratory; UW-RPL, University of Washington Radionuclide Production Laboratory; UW-NMRL, University of Washington Nuclear Medicine Radiolabeling Laboratory
